# Supplementary material
Source: PubMed Central journal article supplement (PMC6616532)
Supplement: NIHMS1035401-supplement-Supplement.pdf [file NIHMS1035401-supplement-Supplement.pdf]

## Supplemental Table

### Effects of canagliflozin on systemic hemodynamics and blood gas parameters during 60 min LAD occlusion

| Parameter                        | Treatment | Condition   |             |             |             |             |             |             |             |             | Condition <i>P</i> -value | Treatment <i>P</i> -value | Interaction <i>P</i> -value |  |
|----------------------------------|-----------|-------------|-------------|-------------|-------------|-------------|-------------|-------------|-------------|-------------|---------------------------|---------------------------|-----------------------------|--|
|                                  |           | Baseline    | Ischemia    |             |             |             |             | Reperfusion |             |             |                           |                           |                             |  |
|                                  |           | 0 min       | 15 min      | 30 min      | 45 min      | 60 min      | 90 min      | 120 min     | 150 min     | 180 min     |                           |                           |                             |  |
| Arterial pH                      | Control   | 7.53 ± 0.58 | 7.52 ± 0.06 | 7.53 ± 0.06 | 7.51 ± 0.04 | 7.49 ± 0.03 | 7.49 ± 0.03 | 7.50 ± 0.04 | 7.50 ± 0.05 | 7.49 ± 0.05 | 0.815                     | 0.899                     | 0.908                       |  |
|                                  | SGLT2i    | 7.51 ± 0.07 | 7.50 ± 0.06 | 7.51 ± 0.05 | 7.51 ± 0.04 | 7.51 ± 0.04 | 7.51 ± 0.05 | 7.51 ± 0.04 | 7.48 ± 0.04 | 7.51 ± 0.05 |                           |                           |                             |  |
| Arterial PCO <sub>2</sub> (mmHg) | Control   | 38 ± 5      | 38 ± 5      | 37 ± 5      | 40 ± 3      | 40 ± 3      | 40 ± 3      | 39 ± 4      | 39 ± 5      | 39 ± 5      | 0.995                     | 0.004                     | 0.800                       |  |
|                                  | SGLT2i    | 43 ± 7 *    | 43 ± 6 *    | 42 ± 6      | 42 ± 3      | 41 ± 3      | 40 ± 4      | 40 ± 3      | 41 ± 4      | 40 ± 3      |                           |                           |                             |  |
| Arterial PO <sub>2</sub> (mmHg)  | Control   | 169 ± 24    | 168 ± 23    | 168 ± 29    | 164 ± 37    | 169 ± 23    | 171 ± 19    | 165 ± 26    | 165 ± 25    | 161 ± 26    | 0.988                     | 0.468                     | 0.998                       |  |
|                                  | SGLT2i    | 166 ± 32    | 168 ± 31    | 171 ± 29    | 166 ± 32    | 165 ± 32    | 156 ± 32    | 160 ± 31    | 153 ± 40    | 156 ± 37    |                           |                           |                             |  |
| HCT (%)                          | Control   | 33 ± 4      | 33 ± 3      | 33 ± 4      | 34 ± 3      | 35 ± 3      | 34 ± 2      | 34 ± 2      | 33 ± 5      | 33 ± 3      | 0.993                     | 0.592                     | 0.942                       |  |
|                                  | SGLT2i    | 33 ± 3      | 34 ± 4      | 34 ± 4      | 34 ± 4      | 34 ± 3      | 33 ± 3      | 33 ± 3      | 35 ± 2      | 35 ± 4      |                           |                           |                             |  |
| Mean Blood Pressure (mmHg)       | Control   | 75 ± 11     | 75 ± 8      | 70 ± 12     | 73 ± 13     | 73 ± 14     | 70 ± 16     | 65 ± 19     | 63 ± 20     | 65 ± 14     | 0.272                     | 0.470                     | 0.999                       |  |
|                                  | SGLT2i    | 76 ± 17     | 75 ± 14     | 73 ± 16     | 68 ± 18     | 70 ± 16     | 64 ± 17     | 61 ± 14     | 60 ± 15     | 62 ± 14     |                           |                           |                             |  |
| Heart Rate (beats/minute)        | Control   | 83 ± 21     | 78 ± 18     | 85 ± 13     | 91 ± 10     | 88 ± 13     | 86 ± 14     | 85 ± 12     | 87 ± 10     | 82 ± 7      | 0.483                     | <0.001                    | 0.262                       |  |
|                                  | SGLT2i    | 67 ± 20     | 66 ± 14     | 62 ± 16 *   | 61 ± 15 *   | 60 ± 13 *   | 82 ± 24     | 82 ± 30     | 76 ± 22     | 82 ± 7      |                           |                           |                             |  |

Values are mean ± SE for saline (n = 6) and canagliflozin (n = 6). \**P* < 0.05 vs. time control

**A**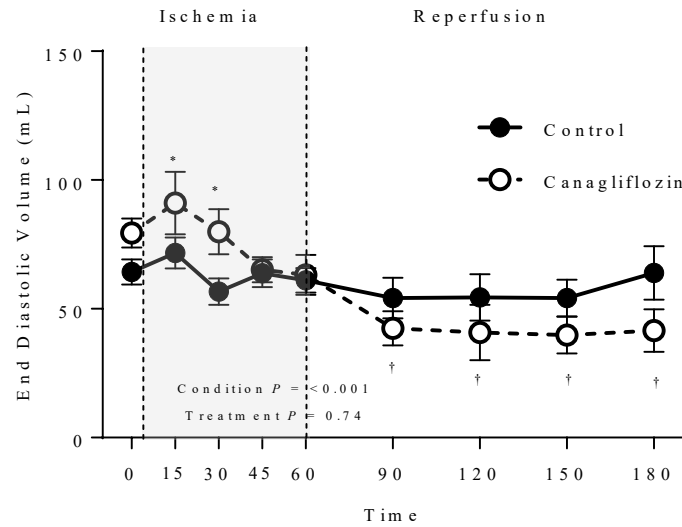**B**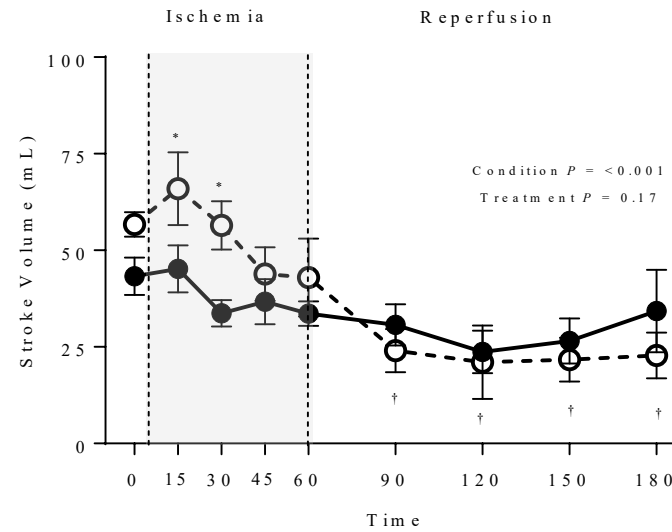**C**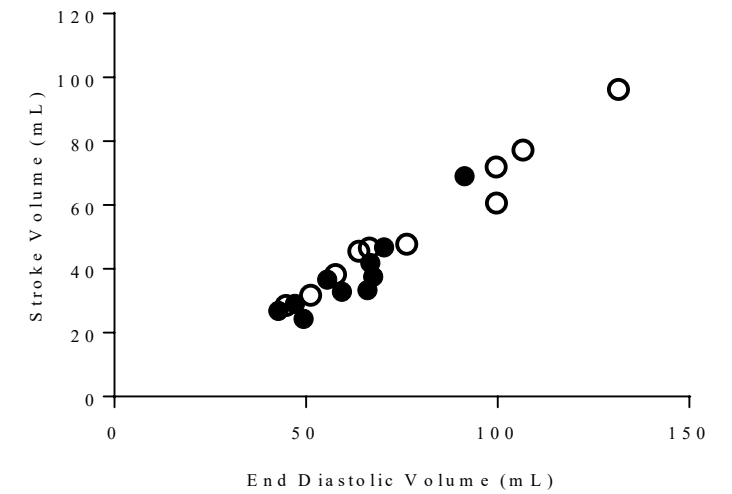

**Figure S.** Effect of ischemia/reperfusion injury on end diastolic volume (Panel A), stroke volume (Panel B) and the relationship between stroke volume and end diastolic volume during 15 and 30 minutes of ischemia (Panel C) in Control ( $n = 5$ ) and SGLT2i (canagliflozin) treated ( $n = 5$ ) swine. \*  $P < 0.05$  vs. Control (same time point), †  $P < 0.05$  vs. baseline value (same treatment).
